# Supplementary material
Source: publisher figshare collection journal article supplement (https://diabetesjournals.figshare.com/articles/dataset/_/17737946)
Supplement: Supplementary file 1 [file 1]

**Supplementary Table 1. Demographic information for donors in diabetic retinopathy group.**

| Donor No. | Eye No. | Age | Sex | Cause of death                 | Diabetes Type | DR Severity | PRP (laser) |
|-----------|---------|-----|-----|--------------------------------|---------------|-------------|-------------|
| 1         | 1       | 58  | M   | Alcoholism/acute pancreatitis  | II            | PDR         | N           |
| 1         | 2       | 58  | M   | Alcoholism/acute pancreatitis  | II            | PDR         | N           |
| 2         | 3       | 70  | M   | Ischemic cardiomyopathy        | II            | Severe NPDR | N           |
| 2         | 4       | 70  | M   | Ischemic cardiomyopathy        | II            | Severe NPDR | N           |
| 3         | 5       | 45  | M   | Glioblastoma                   | I             | Severe NPDR | Y           |
| 3         | 6       | 45  | M   | Glioblastoma                   | I             | Severe NPDR | Y           |
| 4         | 7       | 82  | M   | Acute myocardial infarction    | II            | Severe NPDR | Y           |
| 4         | 8       | 82  | M   | Acute myocardial infarction    | II            | Severe NPDR | Y           |
| 5         | 9       | 70  | M   | Multiorgan failure             | II            | Severe NPDR | N           |
| 5         | 10      | 70  | M   | Multiorgan failure             | II            | Severe NPDR | N           |
| 6         | 11      | 72  | F   | Carcinoma origin indeterminant | Unspecified   | Severe NPDR | N           |
| 6         | 12      | 72  | F   | Carcinoma origin indeterminant | Unspecified   | Severe NPDR | N           |
| 7         | 13      | 70  | M   | Ischemic cardiomyopathy        | II            | Severe NPDR | Y           |
| 7         | 14      | 70  | M   | Ischemic cardiomyopathy        | II            | Severe NPDR | Y           |
| 8         | 15      | 86  | F   | Intracranial hemorrhage        | II            | Severe NPDR | N           |
| 8         | 16      | 86  | F   | Intracranial hemorrhage        | II            | Severe NPDR | N           |
| 9         | 17      | 63  | F   | Septic arthritis               | Unspecified   | Severe NPDR | Y           |
| 10        | 18      | 66  | M   | Acute myocardial infarction    | II            | Severe NPDR | Y           |
| 11        | 19      | 45  | F   | Sepsis                         | I             | PDR         | Y           |
| 12        | 20      | 59  | M   | Acute myocardial infarction    | II            | Severe NPDR | N           |

PRP, Pan retinal photocoagulation; DR, Diabetic retinopathy. PDR, Proliferative DR; NPDR, Non-proliferative DR.

Presence of PRP is determined via post-mortem examination of retina. Retina with incomplete PRP is grouped under Y.
